# Supplementary material
Source: publisher site journal article supplement (https://www.dovepress.com/article/272015)
Supplement: Supplementary file 1 [file get_supplementary_file.php]

**Supplementary table 1.** Primer sequences, utilized in the resequencing of the coding regions

| **Exon number**  **(Forward/Reverse)** | **Nucleotide sequence (5'-3')** |
| --- | --- |
| Exon1-Forward | TCTGTATCAGTGGGTCAAAGTCC |
| Exon1-Reverse | CTGGAAAAGGCAACAAAAGC |
| Exon2&3-Forward | TCTGACCATTGCCTTGAACA |
| Exon2&3-Reverse | CAAATTCCCTTGGCTCTCAG |
| Exon4-Forward | TGATTTTATGCATGCCGAACT |
| Exon4-Reverse | TCCCAGATATTCACCCCAAG |
| Exon5-Forward | TCTGGTTAGAATTGATCCTCTGG |
| Exon5-Reverse | CTAGTGGTCTATTTTGTTATTCATTC |
| Exon6-Forward | TTTGGGCAAGTTGGTCTACA |
| Exon6-Reverse | CACCATTAGTTTGAAACAGATTACA |
| Exon7-Forward | TTGTGCATCTGTAACCATCCTC |
| Exon7-Reverse | GGAGAACACACACTGCCAGA |
| Exon8-Forward | TGTGATTGCAGGGCACTTTA |
| Exon8-Reverse | GGGTGTACACAGGCATTCAG |
| Exon9-Forward | CCCATCCACCCATCTATCTC |
| Exon9-Reverse | CCCAAAATAGCTTCCCTACCC |
